# Supplementary material for: Influence of Different Allocation Methods for Recycling and Dynamic Inventory on CO2 Savings and Payback Times of Light-Weighted Vehicles Computed under Product- and Fleet-Based Analyses: A Case of Internal Combustion Engine Vehicles
Source: MDPI journal article supplement (doi:10.3390/su132413935), 2021-12-16
Supplement: s1 [file s1]

## Supplementary Material

### Influence of Different Allocation Methods for Recycling and Dynamic Inventory on CO<sub>2</sub> Savings and Payback Times of Light-Weighted Vehicles Computed under Product- and Fleet-Based Analyses: A Case of Internal Combustion Engine Vehicles

Pasan Dunuwila <sup>1</sup>, Ko Hamada <sup>1</sup>, Kentaro Takeyama <sup>1</sup>, Daryna Panasiuk <sup>1</sup>, Takeo Hoshino <sup>1</sup>, Shinichiro Morimoto <sup>2</sup>, Kiyotaka Tahara <sup>2</sup> and Ichiro Daigo <sup>1,\*</sup>

<sup>1</sup>Research Center for Advanced Science and Technology, The University of Tokyo, Tokyo 153-0041, Japan; pasan@mfa.t.u-tokyo.ac.jp (P.D.); ikaikami5252blue@outlook.jp (K.H.); takeyama@mfa.t.u-tokyo.ac.jp (K.T.); panasiuk@g.ecc.u-tokyo.ac.jp (D.P.); hoshino@mfa.t.u-tokyo.ac.jp (T.H.)

<sup>2</sup>The National Institute of Advanced Industrial Science and Technology, Ibaraki 305-8569, Japan; sh-morimoto@aist.go.jp (S.M.); k.tahara@aist.go.jp (K.T.)

\* Correspondence: daigo@material.t.u-tokyo.ac.jp

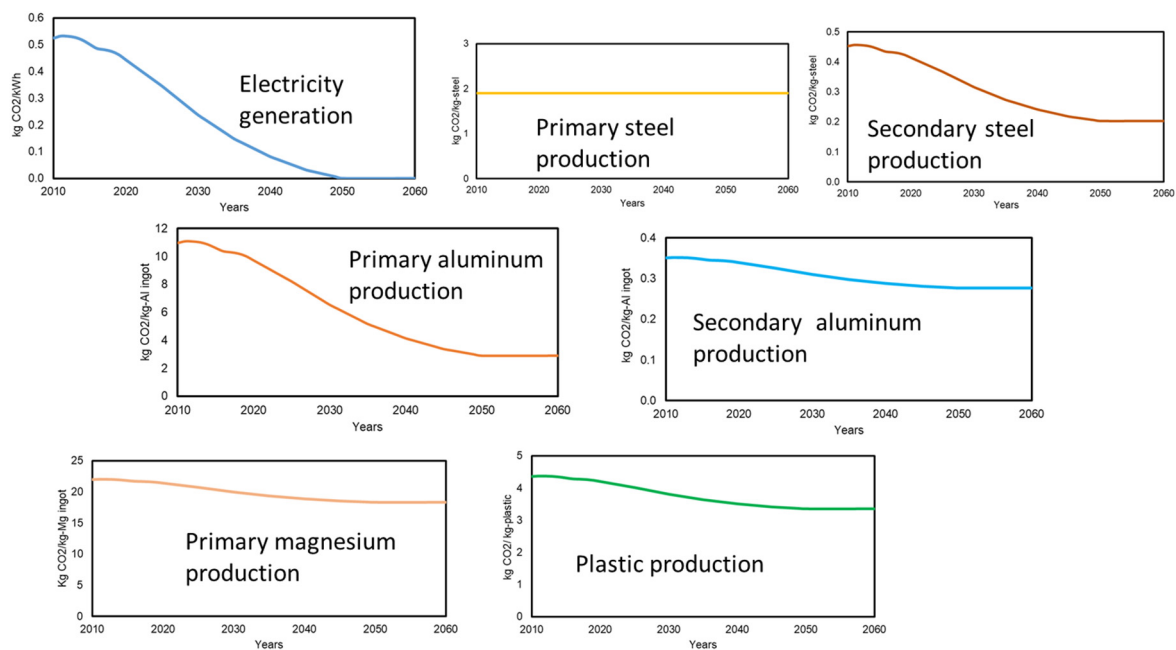

**Figure S1.** Parameters considered for dynamic inventory and their variations along the period forecast

**Table S1.** Parameters considered for the study and their values. BOF and EAF and ICEV refer to blast oxygen furnace, electric arc furnace and internal combustion engine vehicle, respectively.

|            | Parameter   | Value                              | Reference |
|------------|-------------|------------------------------------|-----------|
| Production | Steel (BOF) | 1.9 kg CO <sub>2</sub> /kg product | [1]       |

|                 |                                          |                        |      |
|-----------------|------------------------------------------|------------------------|------|
|                 | Steel (EAF)                              | 0.6 kg CO2/kg product  | [2]  |
|                 | Aluminum (primary ingot)                 | 11.1 kg CO2/kg product | [3]  |
|                 | Aluminum (secondary ingot)               | 0.3 kg CO2/kg product  | [2]  |
|                 | Primary magnesium (pigeon process)       | 25.8 kg CO2/kg product | [4]  |
|                 | Primary magnesium (electrolytic process) | 13.9 kg CO2/kg product | [5]  |
|                 | Magnesium (secondary)                    | 1.7 kg CO2/kg product  | [6]  |
|                 | Plastic                                  | 4.5 kg CO2/kg product  | [2]  |
|                 | Rubber                                   | 1.3 kg CO2/kg product  | [7]  |
|                 | Glass                                    | 1.1 kg CO2/kg product  | [7]  |
|                 | Copper                                   | 4.6 kg CO2/kg product  | [7]  |
|                 | Battery                                  | 19.5 kg CO2/p          | [8]  |
|                 | Fluids                                   | 10.25 kg CO2/L         | [8]  |
|                 | Tire                                     | 24.13 kg CO2/p         | [8]  |
|                 | Gasoline                                 | 0.5 kgCO2/L            | [9]  |
| Finishing       | Flat carbon steel                        | 0.6 kg CO2/kg product  | [10] |
|                 | Long & special steel                     | 0.2 kg CO2/kg product  | [10] |
|                 | Cast iron and steel                      | 0.1 kg CO2/kg product  | [10] |
|                 | Rolled aluminum                          | 0.5 kg CO2/kg product  | [11] |
|                 | Extruded aluminum                        | 0.9 kg CO2/kg product  | [11] |
|                 | Cast aluminum                            | 0.7 kg CO2/kg product  | [11] |
|                 | Rolled magnesium                         | 0.8 kg CO2/kg product  | [8]  |
| Waste treatment | Metals                                   | 0.00016 kg CO2/kg      | [2]  |
|                 | Plastic                                  | 0.765 kg CO2/kg        | [12] |
|                 | Rubber                                   | 0.533 kg CO2/kg        | [2]  |
|                 | Glass                                    | 0.015 kg CO2/ kg       | [13] |
|                 | Fluids                                   | 2.9 kg CO2/kg          | [12] |
|                 | Tires                                    | 0.533 kg CO2/kg        | [2]  |
| Others          | ICEV assembly                            | 1051.2 kg CO2/ICEV     | [7]  |
|                 | Gasoline combustion                      | 2.3 kg CO2/L           | [9]  |

|                                 |                      |                      |                |
|---------------------------------|----------------------|----------------------|----------------|
|                                 | Fuel reduction value | 0.34 L/ 100 kg 100km | Own estimation |
| Recycled content (S)            | Flat carbon steel    | 30%                  | Assumption     |
|                                 | Long & special steel | 30%                  | Assumption     |
|                                 | Cast iron            | 100%                 | [8]            |
|                                 | Wrought aluminum     | 0%                   | [8]            |
|                                 | Secondary aluminum   | 100%                 | [8]            |
|                                 | Rolled Magnesium     | 0%                   | Assumption     |
| Production yield (Y)            | Steel                | 0.92                 | [1]            |
|                                 | Aluminum             | 0.96                 | [14]           |
| End-of-life recycling rates (R) | Flat carbon steel    | 85%                  | [15]           |
|                                 | Long & special steel | 85%                  | [15]           |
|                                 | Cast iron            | 85%                  | [15]           |
|                                 | Wrought aluminum     | 85%                  | [16]           |
|                                 | Cast aluminum        | 85%                  | [16]           |
|                                 | Rolled Magnesium     | 0%                   | Assumption     |

## References

1. Broadbent, C. Steel's Recyclability: Demonstrating the Benefits of Recycling Steel to Achieve a Circular Economy. *Int J Life Cycle Assess* **2016**, 21, 1658–1665, doi:10.1007/s11367-016-1081-1.
2. IDEA Available online: <http://idea-lca.com/?lang=en> (accessed on 18 October 2021).
3. International Aluminium Association *Life Cycle Assessment of Aluminium: Inventory Data for the Worldwide Primary Aluminium Industry*; 2003.
4. Li, H.; Zhang, W.; Li, Q.; Chen, B. Updated CO2 Emission from Mg Production by Pidgeon Process: Implications for Automotive Application Life Cycle. *Resources, Conservation and Recycling* **2015**, 100, 41–48, doi:10.1016/j.resconrec.2015.04.008.
5. ecoinvent Ecoinvent Database Available online: <https://ecoinvent.org/the-ecoinvent-database/> (accessed on 18 October 2021).
6. Tharumarajah, A.; Koltun, P. Improving Environmental Performance of Magnesium Instrument Panels. *Resources, Conservation and Recycling* **2010**, 54, 1189–1195, doi:10.1016/j.resconrec.2010.03.014.
7. Morimoto, K. The Current Status of Life Cycle Assessment on Automobiles. *Toyota Central R&D Labs` R&D review* **1995**, 30, 1–12.
8. Geyer, R. UCSB Energy & GHG Model - WorldAutoSteel Available online: <https://www.worldautosteel.org/life-cycle-thinking/ucsb-energy-ghg-model/> (accessed on 18 October 2021).

9. Argonne National Laboratory GREET2\_2012 (accessed on 5 March 2021).
10. ICF Consulting *Determination of the Impact of Waste Management Activities on Greenhouse Gas Emissions*; ICF Consulting, 2005.
11. European Aluminum Association *Environmental Profile Report for the European Aluminium Industry*; 2000.
12. Yamahara, S.; Yokoyama, M. Regional Characteristics of CO<sub>2</sub> Emissions in Ishikawa Prefecture. *Journal of Environmental Laboratories Association* **1999**, *4*.
13. Edwards, D.W.; Schelling, J. Municipal Waste Life Cycle Assessment: Part 2: Transport Analysis and Glass Case Study. *Process Safety and Environmental Protection* **1999**, *77*, 259–274, doi:10.1205/095758299530143.
14. International Aluminium Association *Life Cycle Assessment: Inventory Data for the Primary Aluminium Industry*; 2007.
15. Björkman, B.; Samuelsson, C. Recycling of Steel. In; Elsevier, 2014; pp. 65–83.
16. Modaresi, R.; Müller, D.B. The Role of Automobiles for the Future of Aluminum Recycling. *Environ. Sci. Technol.* **2012**, *46*, 8587–8594, doi:10.1021/es300648w.
